# Supplementary material for: In situ grown nickel nanoparticles in a calixarene nanoreactor on a graphene–MoS2support for efficient water electrolysis
Source: Royal Society of Chemistry journal article supplement (doi:10.1039/c7se00190h), 2017-01-01
Supplement: c7se00190h1.pdf [file c7se00190h1.pdf]

## Electronic supplementary information

### In-situ grown Nickel Nanoparticles in Calixarene Nanoreactor on Graphene-MoS<sub>2</sub> Support for Efficient Water Electrolysis

Babasaheb J. Waghmode<sup>\*ab</sup>, Siddheshwar N. Bhange<sup>c</sup>, Sreekuttan M. Unni<sup>d</sup>, Kashinath R. Patil<sup>b</sup> and Dipalee D. Malkhede<sup>\*a</sup>

<sup>a</sup>Centre for Advanced studies in Chemistry, Department of Chemistry, Savitribai Phule Pune University, Pune-411007, India.

<sup>b</sup>Centre for Materials Characterization Division, CSIR-National Chemical Laboratory, Dr. Homi Bhabha Road, Pune- 411008, India.

<sup>c</sup>Physical and Materials Chemistry Division, CSIR-National Chemical Laboratory, Dr. Homi Bhabha Road, Pune-411008, India.

<sup>d</sup>Laboratory for Chemistry and Life Sciences, Tokyo Institute of Technology, R1-17, 4259 Nagatsuta, Midori-ku, Yokohama 226-850, Japan.

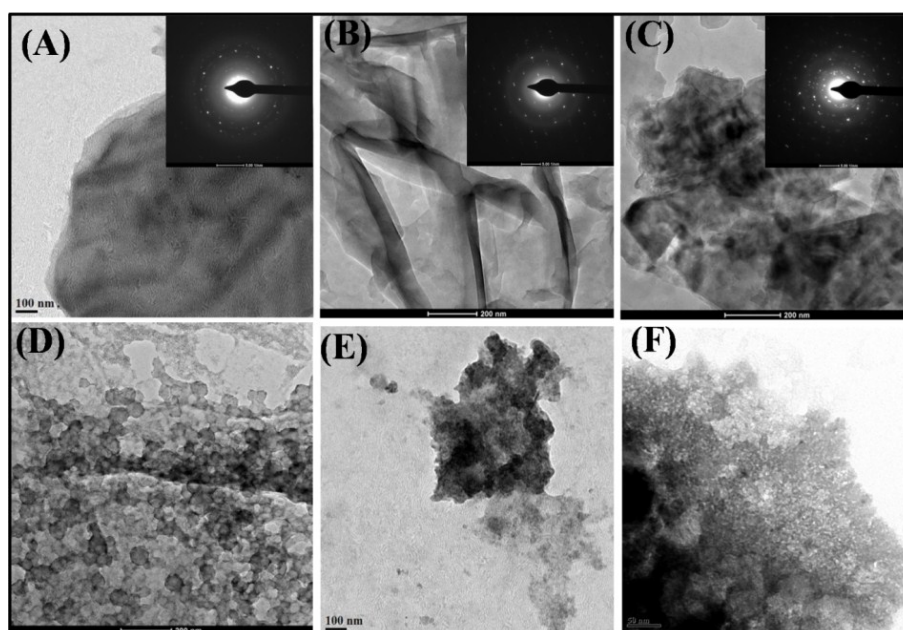

**Figure S1.** TEM micrograph of (A) Gr (B) MoS<sub>2</sub>, (C) Gr-MoS<sub>2</sub>, (D) Ni, (E) GrSC<sub>8</sub>Ni and (F) MoS<sub>2</sub>SC<sub>8</sub>Ni electrocatalysts.

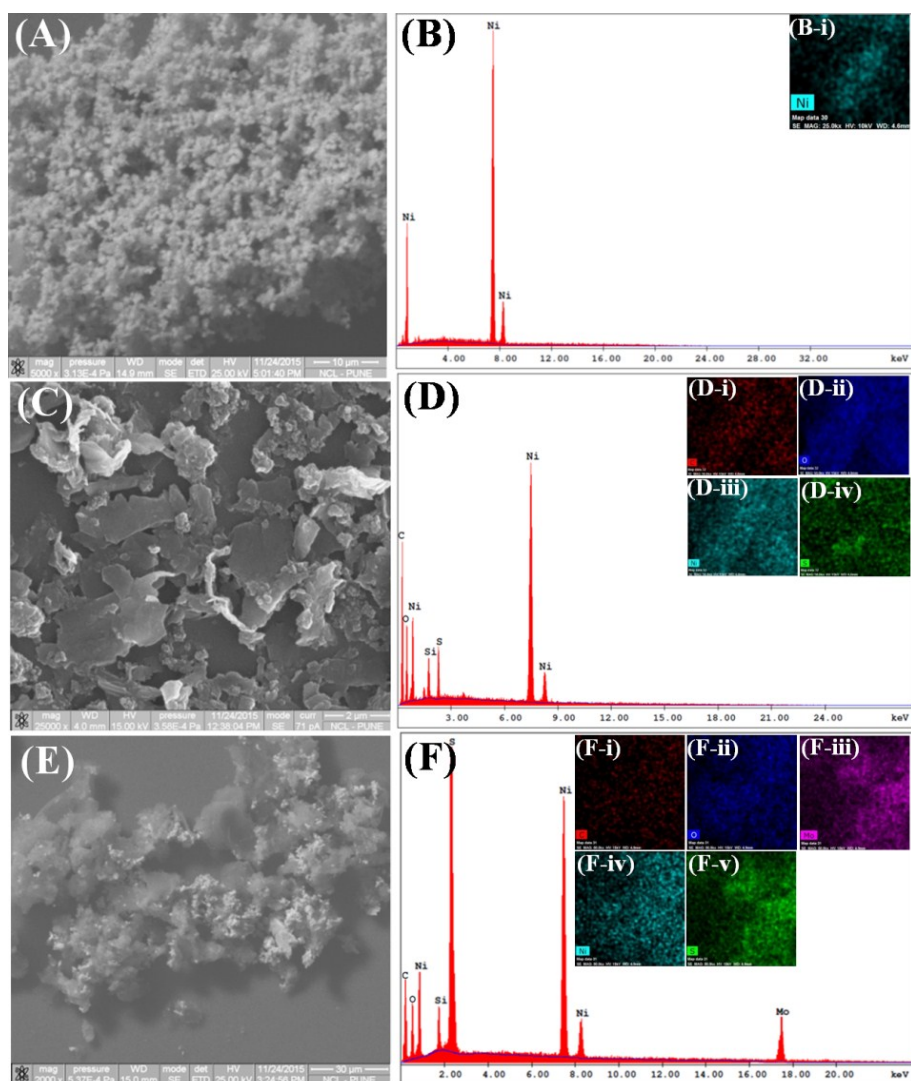

**Figure S2.** SEM micrograph of (A) Ni, (C) GrSC8Ni and (D) GrMoS<sub>2</sub>SC8Ni electrocatalyst; SEM-EDS, Inset with elemental mapping of (B) Ni, (D) GrSC8Ni and (F) GrMoS<sub>2</sub>SC8Ni electrocatalyst

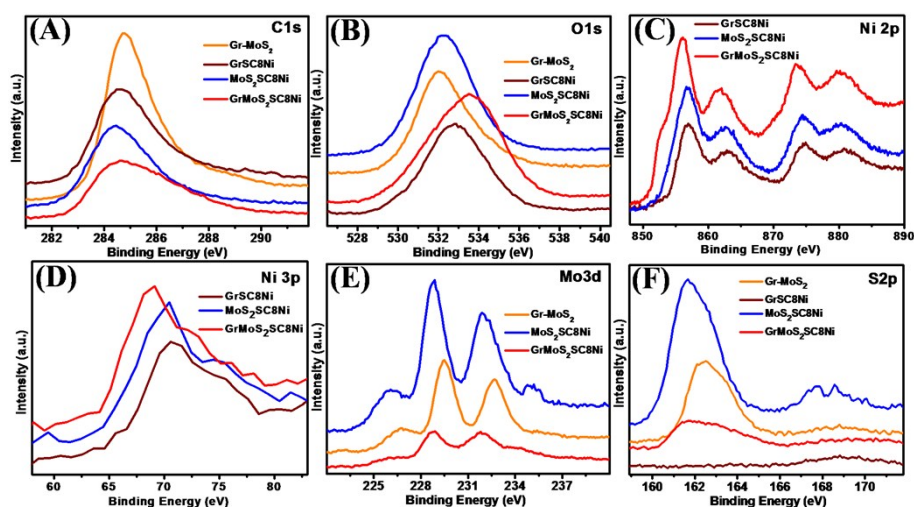

**Figure S3.** Comparative XPS spectra of (A) C1s, (B) O1s, (C) Ni 2p, (D) Ni 3p (E) Mo3d and (F) S2p spectra of Gr, MoS<sub>2</sub> and it's respective composites.

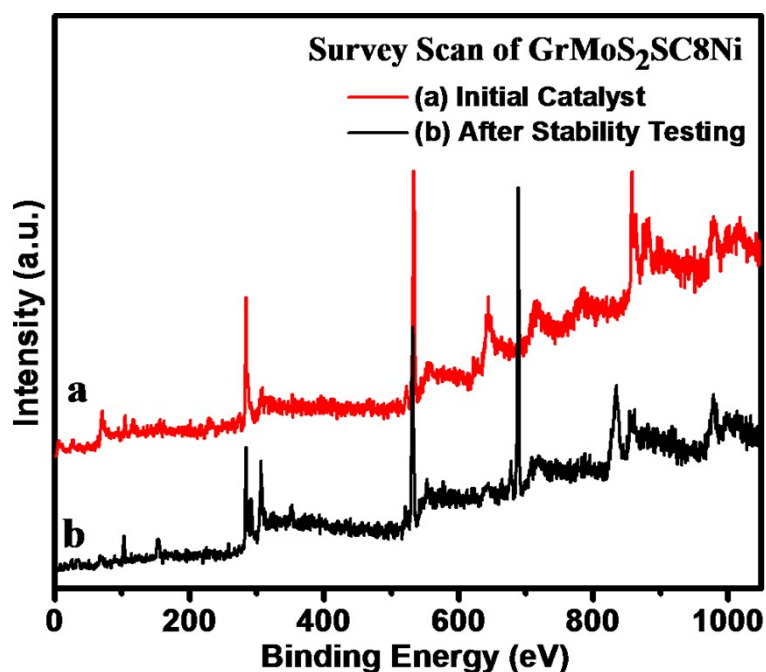

**Figure S4.** Comparative XPS survey scan of GrMoS<sub>2</sub>SC8Ni (a) Initial Catalyst and (b) After Stability Testing.

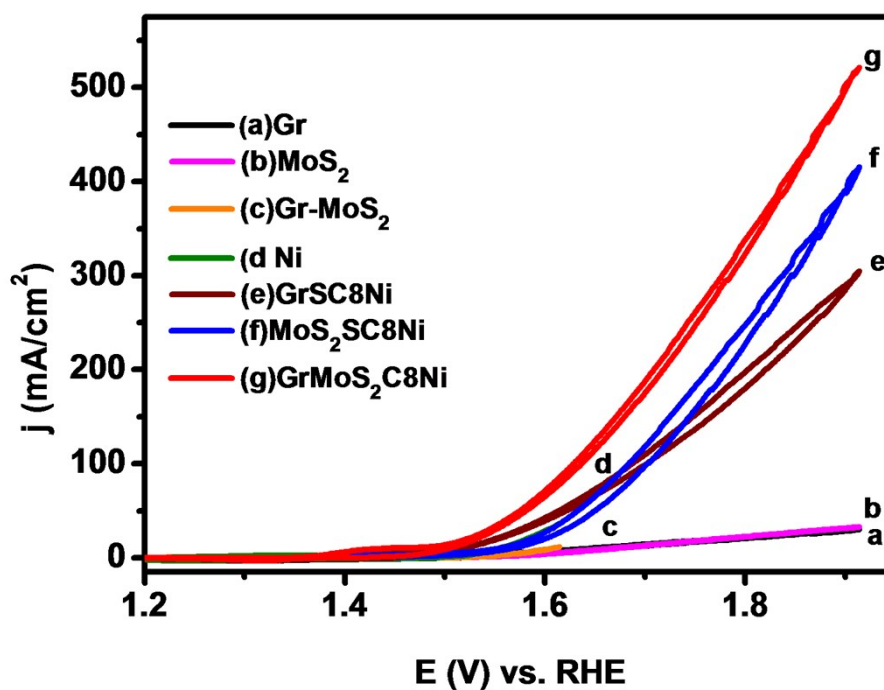

**Figure S5.** Comparative CV plots of (a)Gr (b) MoS<sub>2</sub>, (c) Gr-MoS<sub>2</sub>, (d) Ni, (e) GrSC8Ni, (f) MoS<sub>2</sub>SC8Ni, and (g) GrMoS<sub>2</sub>SC8Ni electrocatalysts in 1 M KOH electrolytes.

Figure S5 shows the CVs of Ni and its composites obtained after different numbers of cycles. Figure S5(g) shows that the GrMoS<sub>2</sub>SC8Ni nanocomposite catalyst shows the oxidation wave attributed to the catalytic oxidation of water. With further cycling, the above oxidation/reduction waves increased in amplitude and

approached a stable value after 100 cycles, suggesting the activation of nanomaterial (i.e., Ni NPs) on the electrode surface.<sup>1,2</sup> Figure S5 (a, b, c and d) shows that the redox waves assignable to the Gr, MoS<sub>2</sub>, Gr-MoS<sub>2</sub> and Ni respectively are all ill shaped. The OER catalytic current of it increases initially until reaching a maximum after 100 cycles and then drops quickly, indicative of poor catalyst stability. For GrSC8Ni, MoS<sub>2</sub>SC8Ni and GrMoS<sub>2</sub>SC8Ni nanocomposite material [Figure S5 (e, f and g)], the OER current decreases slightly during the first 100 cycles. However, this OER activity gradually decreases with CV cycling, consistent with previous reports that RuO<sub>2</sub> and IrO<sub>2</sub> suffer from large chemical degradation during OER process.<sup>3</sup> GrMoS<sub>2</sub>SC8Ni nanocomposite material afford the largest oxygen-evolving current among the studied catalysts. Remarkably, the current density of 10 mA cm<sup>-2</sup>, which is a metric relevant to solar fuel synthesis.<sup>4</sup> GrMoS<sub>2</sub>SC8Ni nanocomposite material achieved at overpotential smaller than that GrSC8Ni, MoS<sub>2</sub>SC8Ni catalysts, Ni and other precursor materials. (Figure S5 and Table S1 of ESI). By contrast, GrSC8Ni and MoS<sub>2</sub>SC8Ni nanocomposite material and commercial Pt/C fail to reach such current density. During OER study first we perform a CV and then LSV study.



**Table S1.** OER performance of the reported Ni based catalyst.

| <b>Table S1:</b> OER performances in the basic medium of present catalyst and other Nickel based electro catalyst. |                                                              |                       |                      |                                     |                                                   |
|--------------------------------------------------------------------------------------------------------------------|--------------------------------------------------------------|-----------------------|----------------------|-------------------------------------|---------------------------------------------------|
| Sr. No                                                                                                             | Catalyst                                                     | Current Density (j)   | Overpotential at (j) | Tafel slope (mV dec <sup>-1</sup> ) | Reference                                         |
| 1                                                                                                                  | Gr                                                           | 10 mA/cm <sup>2</sup> | 528 mV               | 363 mV dec <sup>-1</sup>            | Current Work                                      |
| 2                                                                                                                  | MoS <sub>2</sub>                                             | 10 mA/cm <sup>2</sup> | 436 mV               | 226 mV dec <sup>-1</sup>            | Current Work                                      |
| 3                                                                                                                  | Gr-MoS <sub>2</sub>                                          | 10 mA/cm <sup>2</sup> | 343 mV               | 117 mV dec <sup>-1</sup>            | Current Work                                      |
| 4                                                                                                                  | Ni                                                           | 10 mA/cm <sup>2</sup> | 325 mV               | 67 mV dec <sup>-1</sup>             | Current Work                                      |
| 5                                                                                                                  | GrSC8Ni                                                      | 10 mA/cm <sup>2</sup> | 314 mV               | 51 mV dec <sup>-1</sup>             | Current Work                                      |
| 6                                                                                                                  | MoS <sub>2</sub> SC8Ni                                       | 10 mA/cm <sup>2</sup> | 234 mV               | 48 mV dec <sup>-1</sup>             | Current Work                                      |
| 7                                                                                                                  | GrMoS <sub>2</sub> SC8Ni                                     | 10 mA/cm <sup>2</sup> | 214 mV               | 31 mV dec <sup>-1</sup>             | Current Work                                      |
| 8                                                                                                                  | Amorphous Ni(OH) <sub>2</sub>                                | 10 mA/cm <sup>2</sup> | 344 mV               | 46 mV dec <sup>-1</sup>             | Cryst. Growth Des. 2015, 15, 4475-4483.           |
| 9                                                                                                                  | Ni <sub>1-x</sub> Fe <sub>x</sub> OOH                        | 10 mA/cm <sup>2</sup> | ~320 mV              | 50 mV dec <sup>-1</sup>             | J. Phys. Chem. C 2015, 119, 18303-18316.          |
| 10                                                                                                                 | Ni <sub>0.69</sub> Fe <sub>0.31</sub> O <sub>x</sub> /C      | 10 mA/cm <sup>2</sup> | 280 mV               | 30 mV dec <sup>-1</sup>             | Langmuir 2014, 30, 7893-7901.                     |
| 11                                                                                                                 | NiCo LDH                                                     | 10 mA/cm <sup>2</sup> | 367 mV               | 40 mV dec <sup>-1</sup>             | Nano Lett. 2015, 15, 1421-1427.                   |
| 12                                                                                                                 | β-Ni(OH) <sub>2</sub> nanosheets                             | 10 mA/cm <sup>2</sup> | 425 mV               | 60 mV dec <sup>-1</sup>             | Chem. Mater. 2015, 27, 5702-5711.                 |
| 13                                                                                                                 | ALD NiS <sub>x</sub> film                                    | 10 mA/cm <sup>2</sup> | 372 mV               | 56 mV dec <sup>-1</sup>             | Chem. Mater. 2016, 28, 1155-1164.                 |
| 14                                                                                                                 | PNG-NiCo                                                     | 5 mA/cm <sup>2</sup>  | 373 mV               | 156 mV dec <sup>-1</sup>            | ACS NANO, 2013, 11, 10190-10196.                  |
| 15                                                                                                                 | Ni-Co binary oxide                                           | 10 mA/cm <sup>2</sup> | ~325 mV              | ~39 mV dec <sup>-1</sup>            | ACS NANO, 2014, 8, 9518-9523.                     |
| 16                                                                                                                 | rGO (Ni <sub>2/3</sub> Fe <sub>1/3</sub> -rGO)               | 10 mA/cm <sup>2</sup> | 210 mV               | 40 mV dec <sup>-1</sup>             | ACS NANO, 2015, 9, 177-1984.                      |
| 17                                                                                                                 | Fe <sub>0.2</sub> Ni <sub>0.8</sub> O                        | 10 mA/cm <sup>2</sup> | 297 mV               | 37 mV dec <sup>-1</sup>             | ACS NANO, 2015, 9, 5180-5188.                     |
| 18                                                                                                                 | Ni <sub>2</sub> P/Ni/NF                                      | 10 mA/cm <sup>2</sup> | 200 mV               | 72 mV dec <sup>-1</sup>             | ACS Catal. 2016, 6, 714-721.                      |
| 19                                                                                                                 | Ni <sub>1-x</sub> Fe <sub>x</sub> /NC                        | 10 mA/cm <sup>2</sup> | 330 mV               | 45 mV dec <sup>-1</sup>             | ACS Catal. 2016, 6, 580-588.                      |
| 20                                                                                                                 | 3D-OMN/ISA                                                   | 10 mA/cm <sup>2</sup> | 254 mV               | 39 mV dec <sup>-1</sup>             | ACS Catal. 2016, 6, 1446-1450.                    |
| 21                                                                                                                 | Ni <sub>0.9</sub> Fe <sub>0.1</sub> O <sub>x</sub>           | 10 mA/cm <sup>2</sup> | 336 mV               | 30 mV dec <sup>-1</sup>             | J. Am. Chem. Soc. 2012, 134, 17253-17261.         |
| 22                                                                                                                 | NiFe-LDH/CNT                                                 | 10 mA/cm <sup>2</sup> | 300 mV               | 35 mV dec <sup>-1</sup>             | J. Am. Chem. Soc. 2013, 135, 8452-8455.           |
| 23                                                                                                                 | Ni(OH) <sub>2</sub> /NiOOH                                   | 10 mA/cm <sup>2</sup> | 300 mV               | 40 mV dec <sup>-1</sup>             | J. Am. Chem. Soc. 2013, 135, 12329-12337.         |
| 24                                                                                                                 | α-Ni(OH) <sub>2</sub>                                        | 10 mA/cm <sup>2</sup> | 331 mV               | 42 mV dec <sup>-1</sup>             | J. Am. Chem. Soc. 2014, 136, 7077-7084.           |
| 25                                                                                                                 | Ni <sub>3</sub> N nanosheets/CC                              | 10 mA/cm <sup>2</sup> | 400 mV               | 45 mV dec <sup>-1</sup>             | J. Am. Chem. Soc. 2015, 137, 4119-4125.           |
| 26                                                                                                                 | Sandwich like NiFe/C                                         | 10 mA/cm <sup>2</sup> | ~210 mV              | 30 mV dec <sup>-1</sup>             | ACS Appl. Mater. Interfaces 2015, 7, 9203-9210.   |
| 27                                                                                                                 | [Ni,Fe]O                                                     | 10 mA/cm <sup>2</sup> | 300 mV               | ~48 mV dec <sup>-1</sup>            | ACS Appl. Mater. Interfaces 2015, 7, 19755-19763. |
| 28                                                                                                                 | NiS@SLS                                                      | 11 mA/cm <sup>2</sup> | 297 mV               | 47 mV dec <sup>-1</sup>             | ACS Appl. Mater. Interfaces 2016, 8, 5509-5516.   |
| 29                                                                                                                 | MWCNTs@NCS-2                                                 | 10 mA/cm <sup>2</sup> | ~440 mV              | 96 mV dec <sup>-1</sup>             | ACS Appl. Mater. Interfaces 2016, 8, 945-951.     |
| 30                                                                                                                 | La(Co <sub>0.71</sub> Ni <sub>0.29</sub> ) <sub>0.96-δ</sub> | 10 mA/cm <sup>2</sup> | 265 mV               | 71 mV dec <sup>-1</sup>             | ACS Appl. Mater. Interfaces 2016, 8, 6019-6031.   |
| 31                                                                                                                 | NiSe <sub>2</sub> /Ti                                        | 20 mA/cm <sup>2</sup> | 295 mV               | 82 mV dec <sup>-1</sup>             | ACS Appl. Mater. Interfaces 2016, 8, 4718-4723.   |
| 32                                                                                                                 | SL Ni(OH) <sub>2</sub>                                       | 5 mA/cm <sup>2</sup>  | 302 mV               | 47 mV dec <sup>-1</sup>             | ACS Appl. Mater. Interfaces 2014, 6, 10172-10180. |
| 33                                                                                                                 | CQD/NiFe-LDH                                                 | 10 mA/cm <sup>2</sup> | 235 mV               | 35 mV dec <sup>-1</sup>             | ACS Appl. Mater. Interfaces 2014, 6, 7918-7925.   |
| 34                                                                                                                 | NiFeMn-LDH                                                   | 20 mA/cm <sup>2</sup> | ~289 mV              | ~47 mV dec <sup>-1</sup>            | Chem. Commun., 2016, 52, 908-911.                 |
| 35                                                                                                                 | NiFe LDH/oGSH                                                | 10 mA/cm <sup>2</sup> | 350 mV               | 54 mV dec <sup>-1</sup>             | J. Mater. Chem. A, 2015, 00, 1-7.                 |
| 36                                                                                                                 | NiMo HNRs/TiM                                                | 10 mA/cm <sup>2</sup> | 310 mV               | 68 mV dec <sup>-1</sup>             | J. Mater. Chem. A, 2015, 3, 20056-20059.          |
| 37                                                                                                                 | NiFe LDH array                                               | 10 mA/cm <sup>2</sup> | 210 mV               | 31 mV dec <sup>-1</sup>             | J. Mater. Chem. A, 2016, 4, 167-172.              |

## References:

- 1 Oliva, P.; Leonardi, J.; Laurent, J. F.; Delmas, C.; Braconnier, J. J.; Figlarz, M.; Fievet, F.; Deguibert, A. *J. Power Sources* 1982, 8, 229.
- 2 Medway, S. L.; Lucas, C. A.; Kowal, A.; Nichols, R. J.; Johnson, D. J. *Electroanal. Chem.* 2006, 587, 172.
- 3 Kinoshita, K. *Electrochemical Oxygen Technology*; Wiley-Interscience: New York, 1992.
- 4 Gorlin, Y.; Jaramillo, T. F. *J. Am. Chem. Soc.* 2010, 132, 13612.
